# Supplementary material for: Effect of Low-Level Tragus Stimulation on Cardiac Metabolism in Heart Failure with Preserved Ejection Fraction: A Transcriptomics-Based Analysis
Source: MDPI journal article supplement (doi:10.3390/ijms25084312), 2024-04-13
Supplement: s1 [file s1]

## **SUPPLEMENTAL MATERIALS**

**Effect of low-level tragus stimulation on cardiac metabolism in heart failure with preserved ejection fraction: A transcriptomics-based analysis**

**Chakraborty *et al.***

## SUPPLEMENTAL TABLES

**Table S1: Significantly altered canonical pathways in HFpEF (LS vs HS-sham)**

| Canonical pathway                                                         | -log(p-value) | z-score | DEGs                                                                                                                                                                                                                                                                                               |
|---------------------------------------------------------------------------|---------------|---------|----------------------------------------------------------------------------------------------------------------------------------------------------------------------------------------------------------------------------------------------------------------------------------------------------|
| Oxidative Phosphorylation                                                 | 14.4          | -4.707  | ATP5MF, ATP5PB, ATP5PO, COX10, COX5B, COX6A2, Cox6c, ATP5PD, COX7A2L, NDUFA11, NDUFA4, NDUFA5, NDUFAB1, NDUFB10, NDUFB3, NDUFB4, NDUFB5, NDUFB8, NDUFS1, NDUFS4, NDUFS6, NDUFS8, NDUFV2, UQCRC1, UQCRC2, UQCRQ                                                                                     |
| Fatty Acid $\beta$ -oxidation I                                           | 6.02          | -3      | ACAA2, ACSL1, ECHS1, ECI1, HADH, HADHA, HADHB, HSD17B8, SLC27A1                                                                                                                                                                                                                                    |
| Valine Degradation I                                                      | 8.33          | -3      | ALDH6A1, BCAT2, BCKDHA, BCKDHB, DBT, ECHS1, HADHA, HADHB, HIBADH                                                                                                                                                                                                                                   |
| TCA Cycle II (Eukaryotic)                                                 | 4.91          | -2.646  | ACO2, CS, DLST, FH, IDH3A, OGDH, SDHAF4                                                                                                                                                                                                                                                            |
| Tryptophan Degradation III (Eukaryotic)                                   | 5.05          | -2.449  | ACAA2, ACAT1, GCDH, HADH, HADHA, HADHB, HSD17B8                                                                                                                                                                                                                                                    |
| Glutaryl-CoA Degradation                                                  | 6.29          | -2.449  | ACAA2, ACAT1, GCDH, HADH, HADHA, HADHB, HSD17B8                                                                                                                                                                                                                                                    |
| Stearate Biosynthesis I (Animals)                                         | 2.9           | -2.236  | ACOT2, ACSL1, DBT, GNPAT, PTGR2, SLC27A1, TECR                                                                                                                                                                                                                                                     |
| Isoleucine Degradation I                                                  | 4.99          | -2.236  | ACAA2, ACAT1, BCAT2, ECHS1, HADHA, HADHB                                                                                                                                                                                                                                                           |
| PPAR $\alpha$ /RXR $\alpha$ Activation                                    | 1.81          | -2.496  | ACADL, ACOX1, ADCY5, ADIPOR1*, GHR, GOT2, LPL, PRKACA, RAP1B, RRAS*, RXRA, SLC27A1, TGFB2*                                                                                                                                                                                                         |
| Superpathway of Geranylgeranyldiphosphate Biosynthesis I (via Mevalonate) | 3.53          | -2      | ACAA2, ACAT1, COX10, HADHA, HADHB                                                                                                                                                                                                                                                                  |
| Sirtuin Signaling Pathway                                                 | 10.4          | 3.9     | ACADL, ATP5PB, BAX*, BECN1*, BPGM*, GADD45A*, GOT2, H3-3A/H33B*, LDHD, MAP1LC3B2*, NDRG1*, NDUFA11, NDUFA4, NDUFA5, NDUFAB1, NDUFB10, NDUFB3, NDUFB4, NDUFB5, NDUFB8, NDUFS1, NDUFS4, NDUFS6, NDUFS8, NDUFV2, PDK1, PGAM1*, PGAM2, Polr1d*, SLC25A4, STAT3*, TIMM50, TUBA1C*, TUBA8, UQCRC2, VDAC1 |

\*: Upregulated genes

**Table S2: Effect of LLTS on canonical metabolic pathways ( HS-active vs HS-sham)**

| <b>Canonical pathway</b>  | <b>-log(p-value)</b> | <b>z-score</b> | <b>DEGs</b>                                                                                     |
|---------------------------|----------------------|----------------|-------------------------------------------------------------------------------------------------|
| Oxidative Phosphorylation | 8.05                 | -2.309         | Atp5e, ATP5F1D, ATP5MC3, ATP5PB, Cox6c, COX8A, NDUFA12, NDUFB7, NDUFB9, NDUFS3, NDUFS7, UQCRFS1 |

**Table S3: Top 15 inhibited upstream modulators in HFpEF (LS vs HS-sham)**

| Rank | Upstream Regulator                            | p-value     | z-score | Target Molecules                                                               |
|------|-----------------------------------------------|-------------|---------|--------------------------------------------------------------------------------|
| 1.   | PPARGC1A                                      | 2.8E-22     | -5.756  | ACACB, ACADL, ACADVL, ACAT1, ACOX1, ATP5MF, ATP5PD, ATP5PO, BAX, BCAT2         |
| 2.   | INSR                                          | 1.16E-24    | -5.55   | ACAA2, ACADL, ACADVL, ACO2, ACOT13, ACOT2, ACSL1, ACTA1, ALDH6A1, ANKRD1       |
| 3.   | Alpha catenin                                 | 9.11E-09    | -4.007  | BCL2L1, COL1A1, COL1A2, COL3A1, CTSB, CTSV, ELN, FSTL1, IGFBP4, IGFBP6         |
| 4.   | TSC2                                          | 5.91E-12    | -3.981  | ANXA1, ANXA2, ATF4, ATP6V0B, BAX, CCND3, CDKN1A, CREG1, CRYAB, DDIT3           |
| 5.   | KLF15                                         | 9.52E-16    | -3.897  | ACADL, ACADVL, ACAT1, ACOX1, ACSL1, ACSS1, BECN1, CCN2, CPT2, FABP3            |
| 6.   | PPARA                                         | 2.21E-16    | -3.778  | ACAA2, ACADL, ACADVL, ACAT1, ACOT2, ACOX1, ACSL1, ACTA1, ALDH9A1, ANXA2        |
| 7.   | HBA1/HBA2                                     | 1.85E-10    | -3.742  | ATP5MF, ATP5PO, COX6A2, Cox6c, NDUFA11, NDUFA4, NDUFA5, NDUFB4, NDUFB8, NDUFS4 |
| 8.   | miR-199a-5p (and other miRNAs w/seed CCAGUGU) | 0.000000326 | -3.69   | ACTA1, ACTG2, ALOX5AP, CDKN1A, COL1A1, COL4A1, CSTB, FN1, ID3, ISG15           |
| 9.   | miR-30c-5p (and other miRNAs w/seed GUAAACA)  | 0.0000372   | -3.532  | ATP2A2, BECN1, CCN2, COL1A1, COL1A2, COL4A1, COL8A1, GNAI2, IDH1, MLLT11       |
| 10.  | PNPLA2                                        | 0.000000017 | -3.516  | ACAA2, ACADL, ACADVL, ACO2, ACOT2, ACOX1, ACSL1, CPT2, CS, FH                  |
| 11.  | KLF11                                         | 0.0000528   | -3.464  | CCN2, COL1A2, COL3A1, CPT2, FABP3, HADHB, IDH3A, ILK, PLAT, SERPINE1           |
| 12.  | CR1L                                          | 9.65E-09    | -3.278  | CCN2, COL18A1, COL1A1, COL1A2, COL3A1, COL4A1, COL8A1, FBN1, MGP, SERPINE1     |
| 13.  | PPARD                                         | 1.66E-12    | -3.236  | ACAA2, ACACB, ACADL, ACADVL, ACOX1, ALDH9A1, AQP7, BCL2L1, CPT2, ECH1          |
| 14.  | let-7a-5p (and other miRNAs w/seed GAGGUAG)   | 0.0000355   | -3.22   | BCL2L1, CAPG, CHMP2A, COL1A1, COL1A2, COL3A1, COL4A1, COL8A1, GYS1, HBA1/HBA2  |
| 15.  | PPARGC1B                                      | 0.000000192 | -3.074  | ACACB, ACADL, ACADVL, ATP5MF, ATP5PO, CIDEA, CKB, CS, MYH6, NDUFV2             |

**Table S4: Top 15 activated upstream modulators in HFpEF (LS vs HS-sham)**

| Rank | Upstream Regulator | p-value   | z-score | Target Molecules                                                                          |
|------|--------------------|-----------|---------|-------------------------------------------------------------------------------------------|
| 1.   | TGFB1              | 6.01E-25  | 6.569   | ABCF1, ACAA2, ACSS1, ACTA1, ACTG2, ADAM19, ADK, ALOX15, ALOX5AP, ANKRD1                   |
| 2.   | TP53               | 1.22E-55  | 5.422   | ACAA2, ACACB, ACADL, ACADVL, ACAT1, ACO2, ACSF2, ACSF3, ACSL1, ACSS1                      |
| 3.   | MTPN               | 4.06E-17  | 4.93    | ANXA1, BAX, BCL2L1, BNIP3, Calm1 (includes others), CASQ1, CCND3, COL1A1, COL1A2, COL8A1  |
| 4.   | CLPP               | 3.37E-21  | 4.707   | ACADL, ACADVL, ACO2, ACOT13, ACSL1, CRAT, CS, DLST, ECH1, ECI1                            |
| 5.   | AGT                | 1.65E-14  | 4.324   | ACTA1, ADIPOR1, ALOX15, ANXA1, ATP1B1, BAX, BECN1, BOK, CCN2, CCND3                       |
| 6.   | MAP4K4             | 8.47E-19  | 4.139   | ACAA2, ACACB, ACADVL, ACO2, ATP6V0E1, BCAT2, BCKDHB, Calm1 (includes others), COQ3, COX10 |
| 7.   | TNF                | 1.06E-18  | 4.13    | ACADVL, ACOX1, ACSL1, ACTA1, ADCY5, AEBP1, AKR1B1, ALOX5AP, ANXA1, ANXA11                 |
| 8.   | MRTFB              | 9.5E-12   | 3.865   | ACTA1, ANKRD1, BCL2L1, CCN2, CD151, COL3A1, CYBA, FIBIN, FILIP1L, GADD45A                 |
| 9.   | NRG1               | 1.16E-19  | 3.703   | ACAT1, ANKRD1, ATF4, BCL2L1, BNIP3, CCN2, CCND3, CDKN1A, CHCHD3, COL1A1                   |
| 10.  | SLC27A2            | 3.21E-14  | 3.674   | ACAA2, ACADL, ACOX1, ACSL1, ALDH1A1, CPT2, CRAT, DHRS4, ECI1, ETFDH                       |
| 11.  | MRTFA              | 5.67E-14  | 3.653   | ACTA1, ANKRD1, ARPC1B, BCL2L1, CCN2, CCN5, CD151, CYBA, FABP3, FIBIN                      |
| 12.  | PRL                | 1.21E-23  | 3.609   | ACTR3, ANXA2, ANXA5, ATP2A2, ATP5PD, BAG1, BCL2L1, BOK, CCND3, CDKN1A                     |
| 13.  | KDM5A              | 1.62E-15  | 3.528   | ACO2, ACTN2, ATP1B1, BCKDHA, CHCHD3, COL1A2, DLST, DMPK, GADD45GIP1, HMOX1                |
| 14.  | RAF1               | 3.61E-09  | 3.477   | ANKRD1, ANXA1, BECN1, BTG1, CA2, CCN5, CDKN1A, CRYAB, EMP1, GRN                           |
| 15.  | IL6                | 0.0000135 | 3.441   | ACOX1, ANXA1, ATP2A2, BAX, BCL2L1, CCN2, CDKN1A, CEBPD, CLU, COL1A1                       |

**Table S5: Significantly altered upstream modulators by LLTS**

| Rank | Upstream Regulator | p-value    | z-score* | Target Molecules                                                                                                                                             |
|------|--------------------|------------|----------|--------------------------------------------------------------------------------------------------------------------------------------------------------------|
| 1.   | MAPK1              | 0.00343    | -2.345   | APOE, CAV3, CCL5, FLNC, GBP1, HBA1/HBA2, IFITM3, IRF7, JUND, PDLIM3, SERPINE1, SOCS2                                                                         |
| 2.   | Gsk3               | 0.0032     | -2.224   | ATF4, DDIT3, NKX2-5, TNNC1, TNNI3                                                                                                                            |
| 3.   | RB1                | 0.00038    | -2.21    | ATP6V1F, CKM, DDIT3, DYNLRB1, GRPEL1, IFITM3, MDH1, MRPL12, NDUFS7, NKX2-5, PARK7, SERPINE1, TNNC1, TNNT2, Tpm1, UQCRFS1                                     |
| 4.   | INSR               | 0.0163     | -2       | ATP5F1D, ATP5MC3, Calm1 (includes others), ETFB, FLNC, IFITM2, NDUFB9, SERPINE1, SIRT2, SOCS2, YEATS4                                                        |
| 5.   | IFNA2              | 0.0112     | 2.795    | B2M, CCL5, GBP1, IFITM2, IFITM3, IRF7, LY6E, SOCS2                                                                                                           |
| 6.   | STAT1              | 0.0168     | 2.764    | APOE, B2M, CCL5, CLIC5, FCER1G, GBP1, IFITM2, IFITM3, IRF7, LY6E                                                                                             |
| 7.   | KDM5A              | 0.00000529 | 2.53     | ATP6V1F, GRPEL1, MDH1, MRPL12, NDUFS7, PARK7, TNNC1, TNNT2, Tpm1, UQCRFS1                                                                                    |
| 8.   | IFNAR1             | 0.0464     | 2.179    | B2M, CCL5, CLIC5, IRF7, SERPINE1                                                                                                                             |
| 9.   | RICTOR             | 1.12E-13   | 2.041    | Atp5e, ATP5F1D, ATP5MC3, ATP5PB, ATP6V0B, ATP6V1F, Cox6c, COX8A, NDUFB7, NDUFB9, NDUFC1, NDUFS3, NDUFS7, POMP, PSMB4, PSMB5, PXN, RPL17, RPL18, RPL26, Rpl29 |

\*: activation pattern in HS sham group compared to HS-active group

**Figure S1: IPA prediction of branch chain amino acid catabolism in HFpEF ( LS vs HS-sham). Valine (A) and isoleucine (B) catabolism were predicted to be inhibited.**

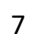





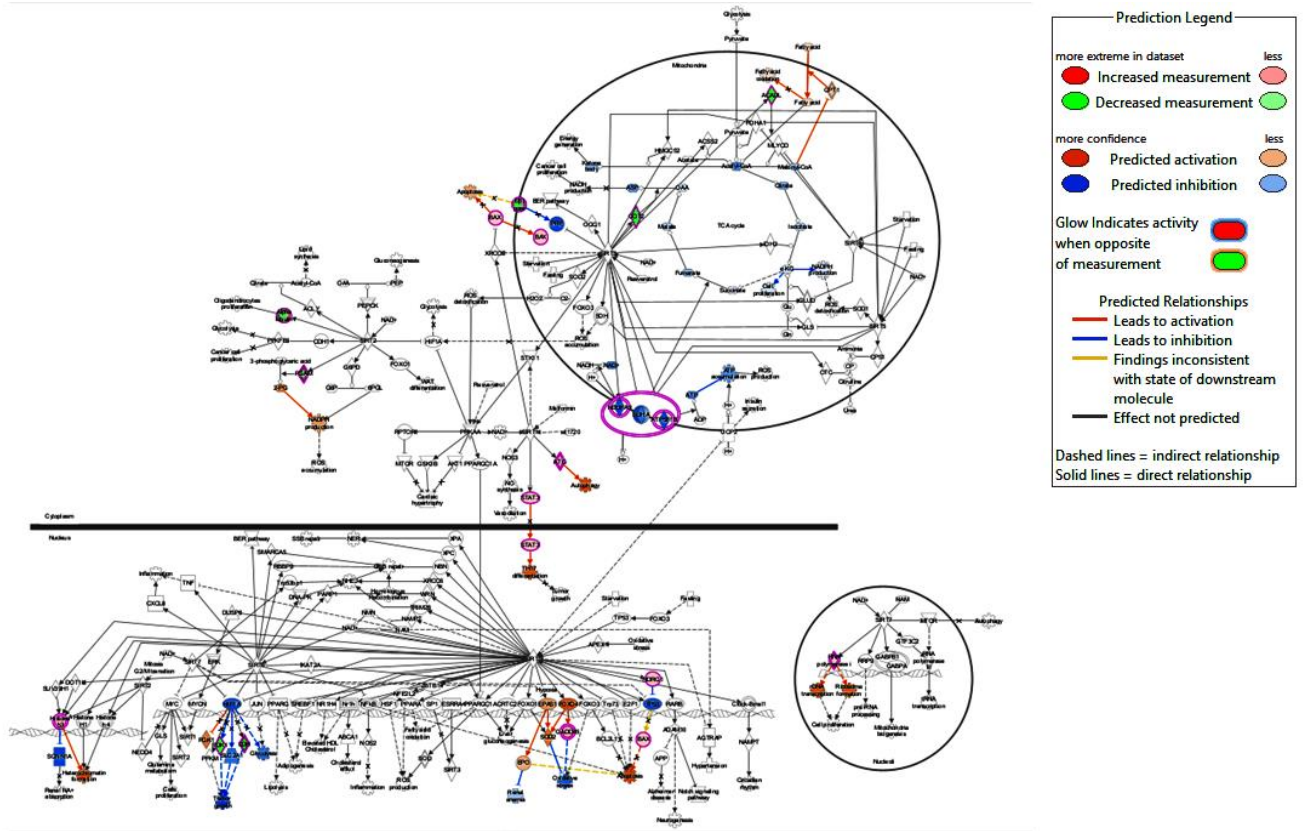

**Figure S3: IPA prediction of sirtuin signaling in HFpEF (LS vs HS-sham)**

Predicted activation of sirtuin signaling is associated with reduced fatty acid oxidation, reduced generation of acetyl CoA and TCA cycle intermediates, inhibition of mitochondrial oxidative phosphorylation, and reduced ATP generation.
